# Supplementary material for: Selective mild oxidation of methane to methanol or formic acid on Fe–MOR catalysts
Source: Royal Society of Chemistry journal article supplement (doi:10.1039/c9cy01640f), 2019-01-01
Supplement: c9cy01640f1.pdf [file c9cy01640f1.pdf]

## Supporting information

### Selective mild oxidation of methane to methanol or formic acid on Fe-MOR catalysts

Zhihao Fang,<sup>1</sup>† Haruno Murayama,<sup>2</sup>† Qi Zhao,<sup>1</sup>† Bing Liu,<sup>1</sup> Feng Jiang,<sup>1</sup> Yuebing Xu,<sup>1</sup> Makoto Tokunaga,<sup>2</sup> Xiaohao Liu<sup>1</sup>\*

<sup>1</sup>Department of Chemical Engineering, School of Chemical and Material Engineering, Jiangnan University, Wuxi 214122, P. R. China

<sup>2</sup>Department of Chemistry, Graduate School of Science, Kyushu University, 744 Motoooka, Nishi-ku, Fukuoka, 819-0395, Japan

† These authors contributed equally to this work

\* Corresponding author:

**Email address:** [liuxh@jiangnan.edu.cn](mailto:liuxh@jiangnan.edu.cn) (X.L.)

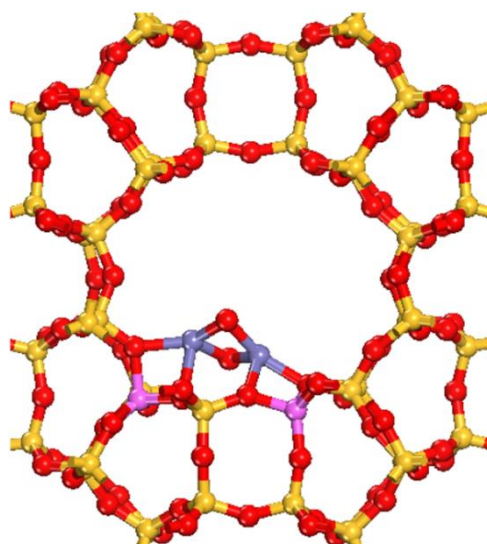

**Figure S1.** Calculated structure model of MOR-supported  $[\text{Fe}_2(\mu\text{-O})_2]^{2+}$  dimer species. Red, yellow, purple, grey blue and white balls represent O, Si, Al, Fe and H atoms, respectively.

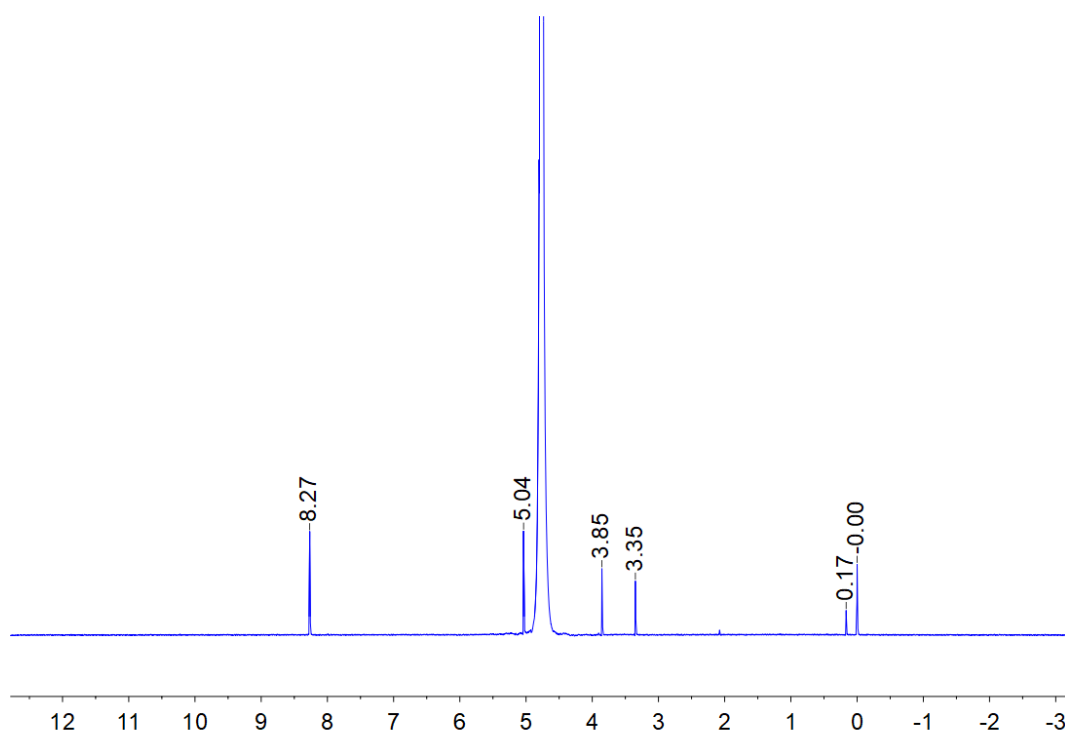

**Figure S2.** A typical  $^1\text{H}$ -NMR spectrum obtained from the direct partial oxidation of methane with  $\text{H}_2\text{O}_2$  on 0.5 wt% Fe/MOR-air. The oxygenated products were identified as methanol ( $\delta = 3.35$  ppm), methyl hydroperoxide ( $\delta = 3.85$  ppm), methane diol ( $\delta = 5.04$  ppm), and formic acid ( $\delta = 8.27$  ppm). Resonances at  $\delta = 0.17$  and 4.78 ppm arise from the methane and water, respectively.

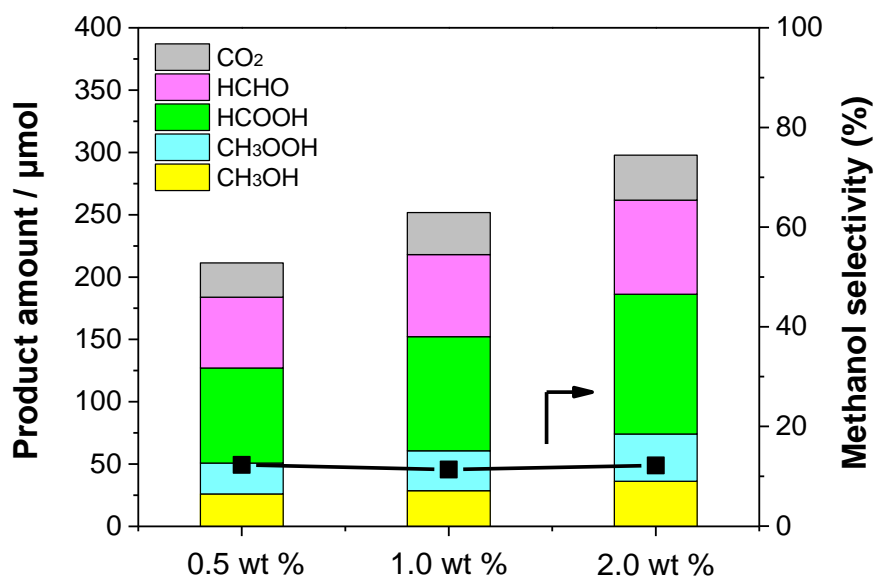

**Figure S3.** Comparison of the activity and selectivity on H-MOR supported Fe catalysts with different Fe loading in weight % for methane partial oxidation. Reaction condition: autoclave reactor, H<sub>2</sub>O<sub>2</sub> solution 20 mL, [H<sub>2</sub>O<sub>2</sub>] = 0.5M, 30 bar of 95% CH<sub>4</sub>/N<sub>2</sub>, 80 °C, 1 h, 30 mg catalyst.

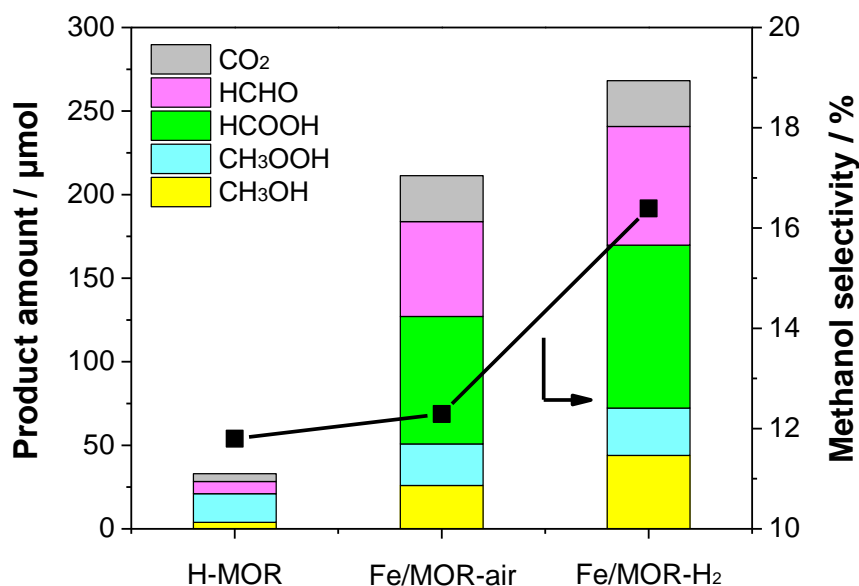

**Figure S4.** Comparison of the activity and selectivity for methane partial oxidation with H<sub>2</sub>O<sub>2</sub> over H-MOR, 0.5 wt % Fe/MOR-air and 0.5 wt% Fe/MOR-H<sub>2</sub> catalysts. Reaction condition: H<sub>2</sub>O<sub>2</sub> solution 20 mL, [H<sub>2</sub>O<sub>2</sub>] = 0.5M, 30 bar of 95% CH<sub>4</sub>/N<sub>2</sub>, 80 °C, 30 mg catalyst.

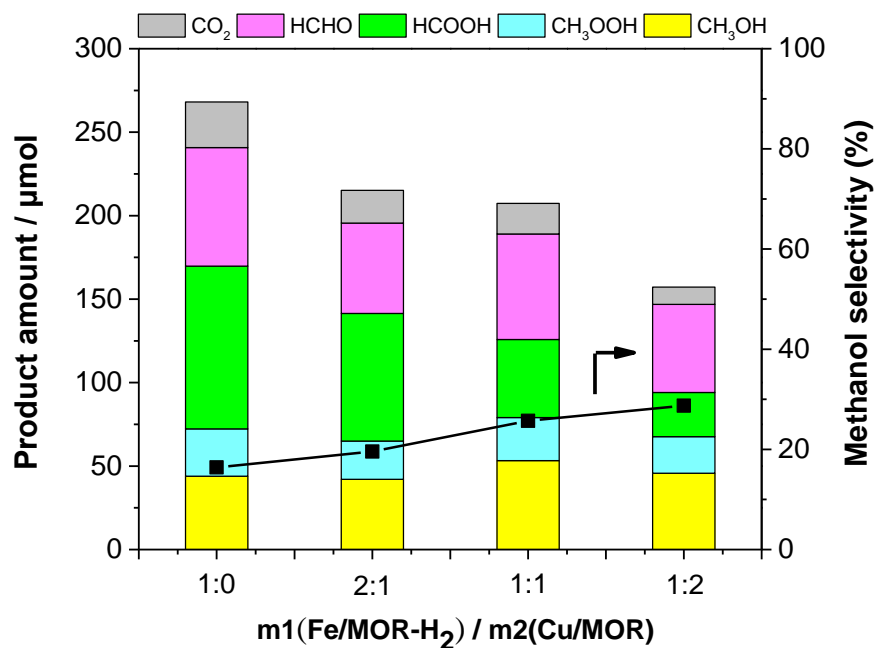

**Figure S5.** Effect of heterogeneous Cu on the methanol selectivity for methane partial oxidation with H<sub>2</sub>O<sub>2</sub> using 0.5 wt % Fe/MOR-H<sub>2</sub> catalyst. Reaction condition: H<sub>2</sub>O<sub>2</sub> solution 20 mL, [H<sub>2</sub>O<sub>2</sub>] = 0.5M, 30 bar of 95% CH<sub>4</sub>/N<sub>2</sub>, 80 °C, 30 mg catalyst.

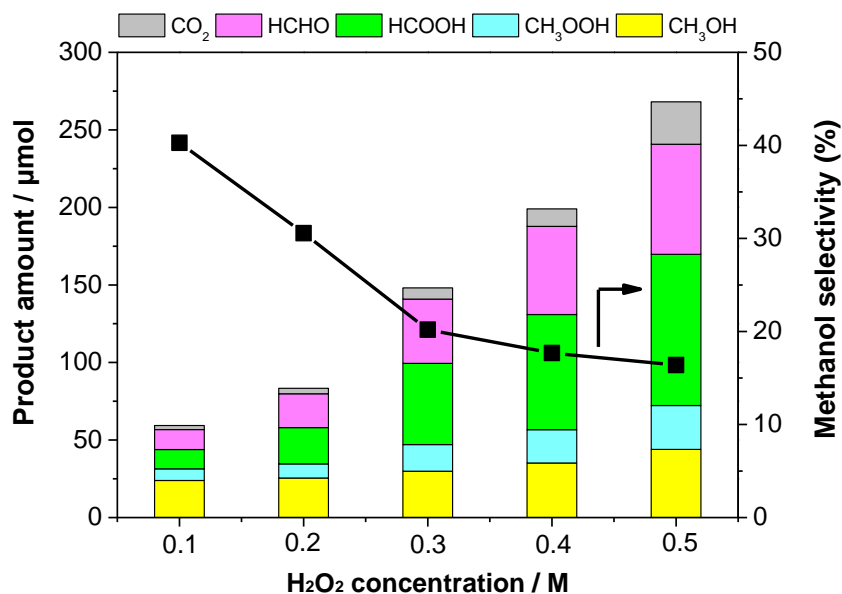

**Figure S6.** Effect of H<sub>2</sub>O<sub>2</sub> concentration on the methanol selectivity for methane partial oxidation with H<sub>2</sub>O<sub>2</sub> using 0.5 wt % Fe/MOR-H<sub>2</sub> catalyst. Reaction condition: H<sub>2</sub>O<sub>2</sub> solution 20 mL, [H<sub>2</sub>O<sub>2</sub>] = 0.5M, 30 bar of 95% CH<sub>4</sub>/N<sub>2</sub>, 80 °C, 30 mg catalyst.

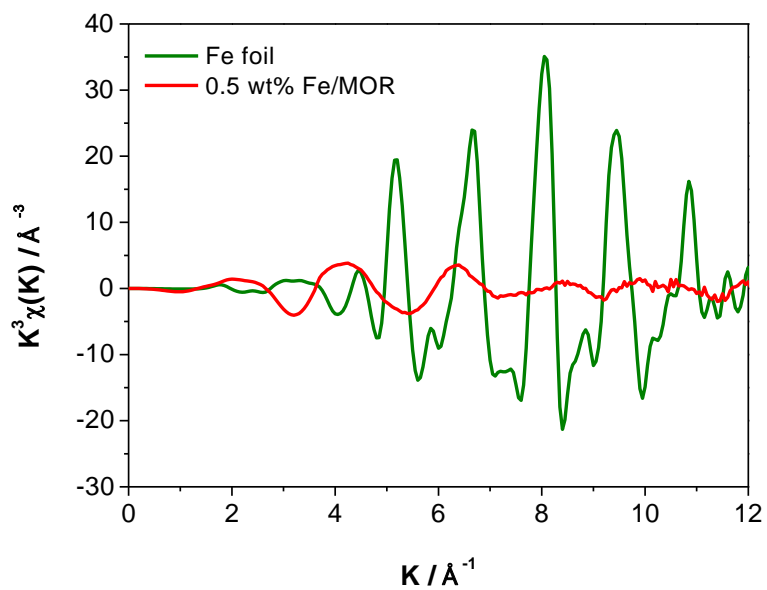

**Figure S7.**  $k^3$ -weighted EXAFS oscillation for 0.5 wt% Fe/MOR-air catalyst and reference Fe foil.

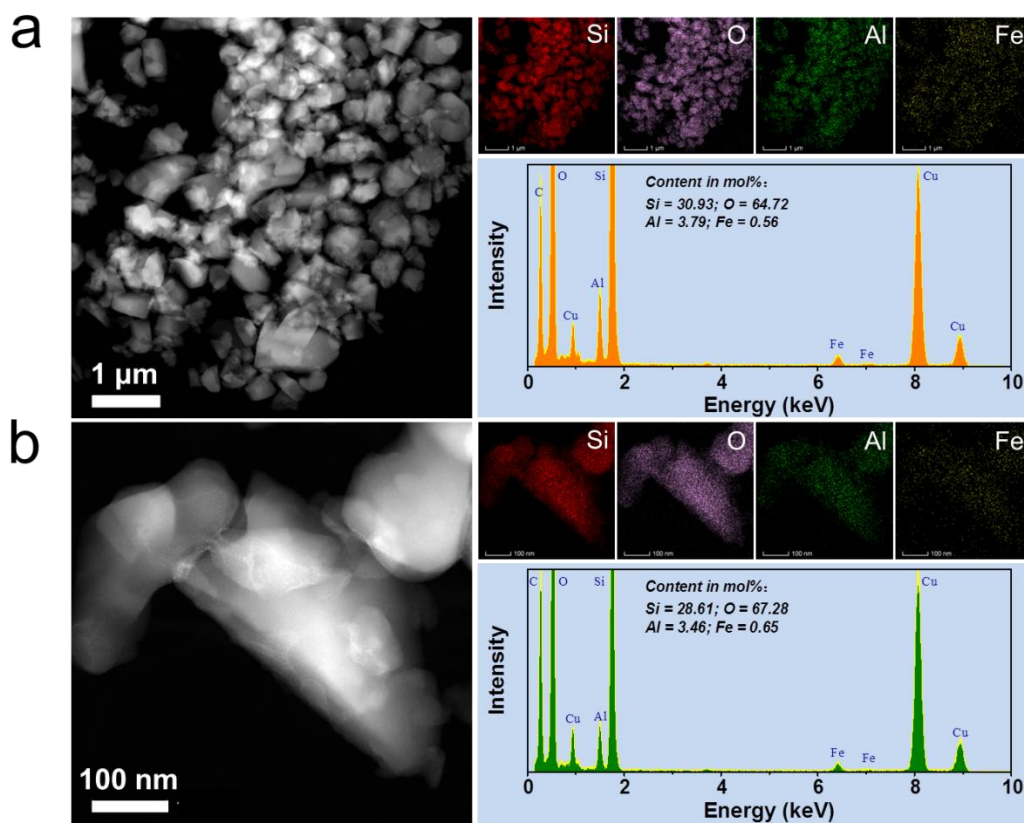

**Figure S8.** HAADF-STEM images, STEM-EDX elemental mappings and STEM-EDX spectrum of 0.5 wt% Fe/MOR- $H_2$  catalyst.

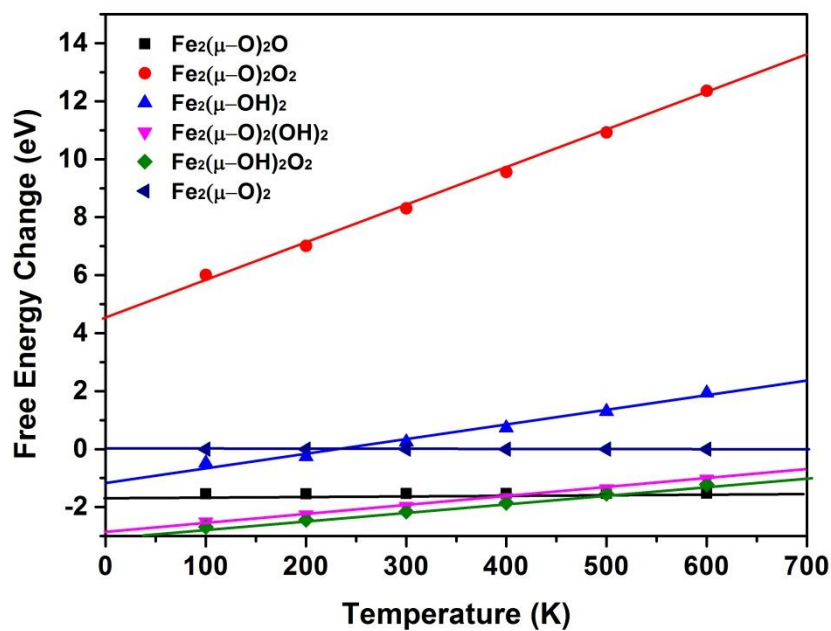

**Figure S9.** Calculated Gibbs free energy change ( $\Delta G$ ) of the formation of  $[\text{Fe}_2(\mu\text{-O})_2\text{O}]$ ,  $[\text{Fe}_2(\mu\text{-O})_2\text{O}_2]$ ,  $[\text{Fe}_2(\mu\text{-O})_2(\text{OH})_2]$ ,  $[\text{Fe}_2(\mu\text{-OH})_2]$  and  $[\text{Fe}_2(\mu\text{-OH})_2\text{O}_2]$  species.

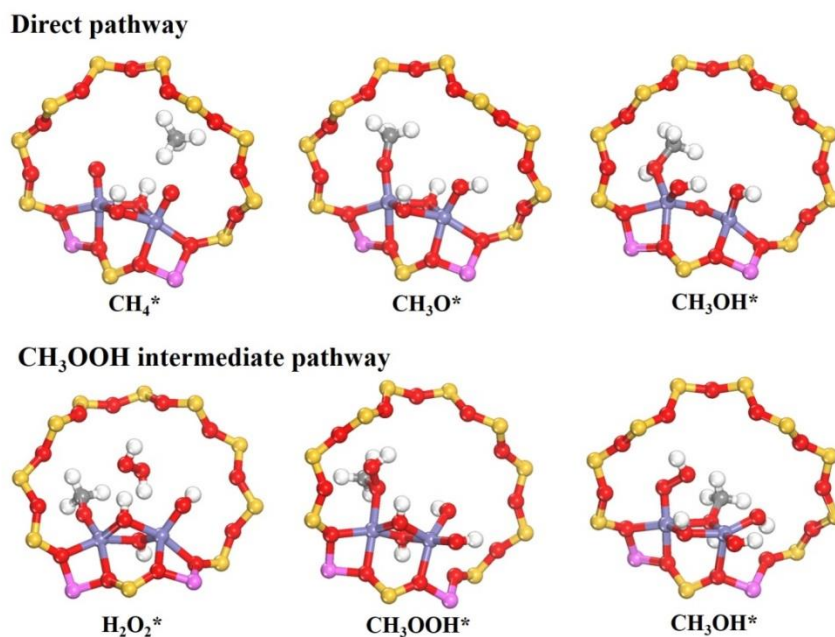

**Figure S10.** Calculated intermediate structures for  $\text{CH}_3\text{OH}$  formation via direct pathway and  $\text{CH}_3\text{OOH}$  intermediate pathway in Fe/MOR. Red, yellow, purple, grey blue, grey and white balls represent O, Si, Al, Fe, C and H atoms, respectively.

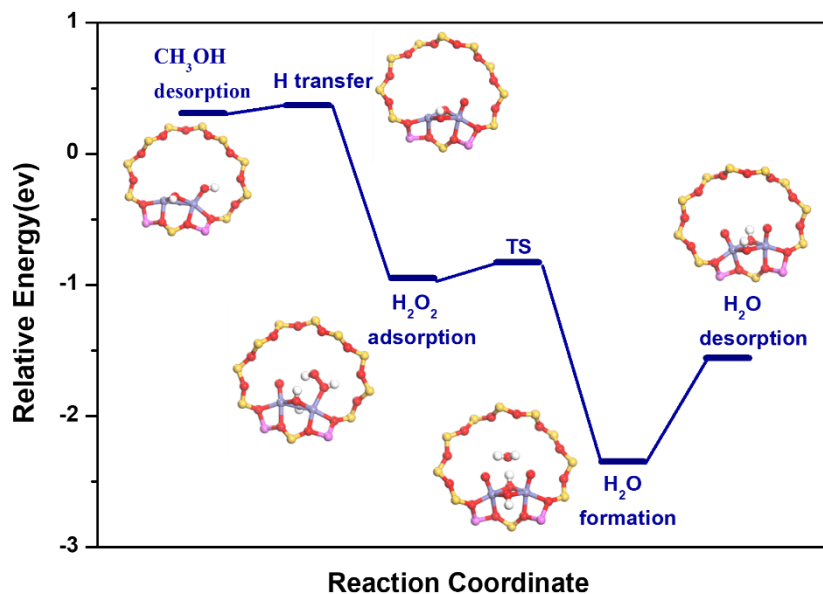

**Figure S11.** Catalyst regeneration process for direct  $\text{CH}_3\text{OH}$  formation pathway.

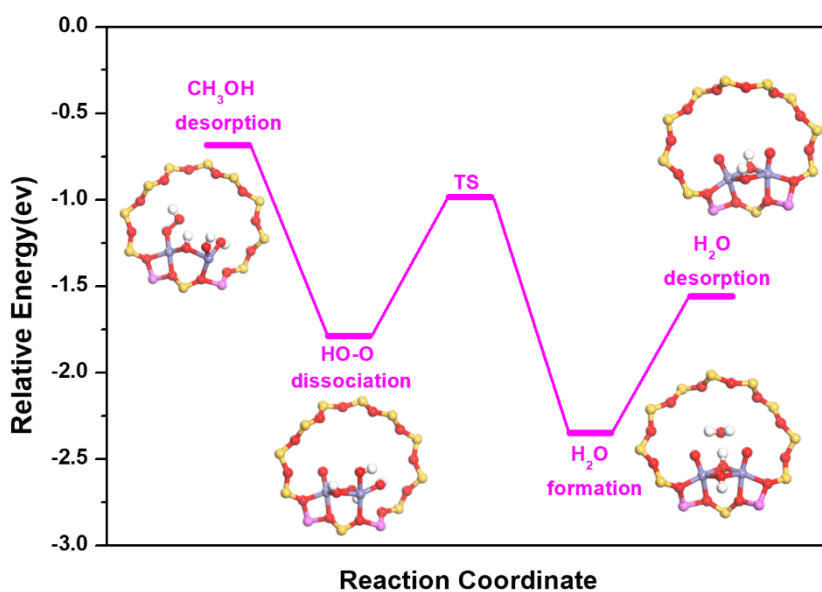

**Figure S12.** Catalyst regeneration process for  $\text{CH}_3\text{OH}$  formation via  $\text{CH}_3\text{OOH}$  intermediate pathway.

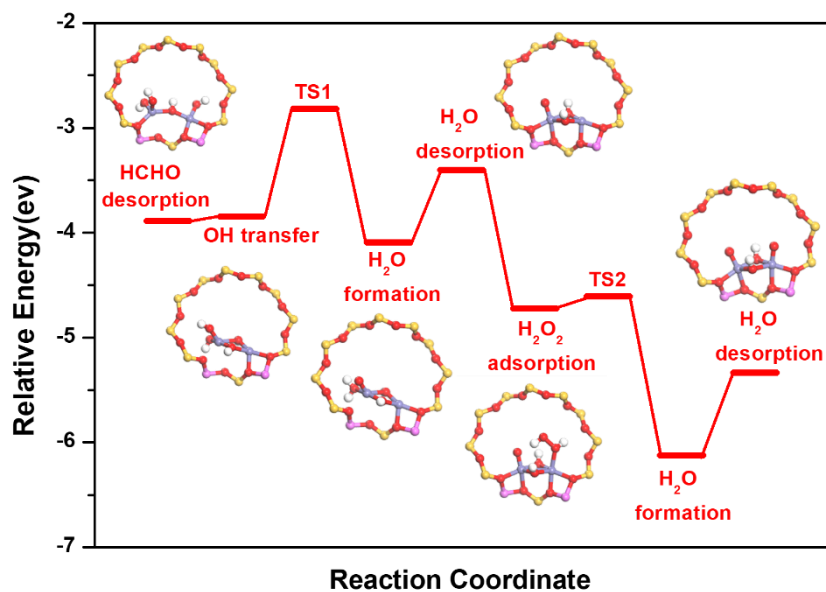

Figure S13. Catalyst regeneration process for HCHO formation pathway.

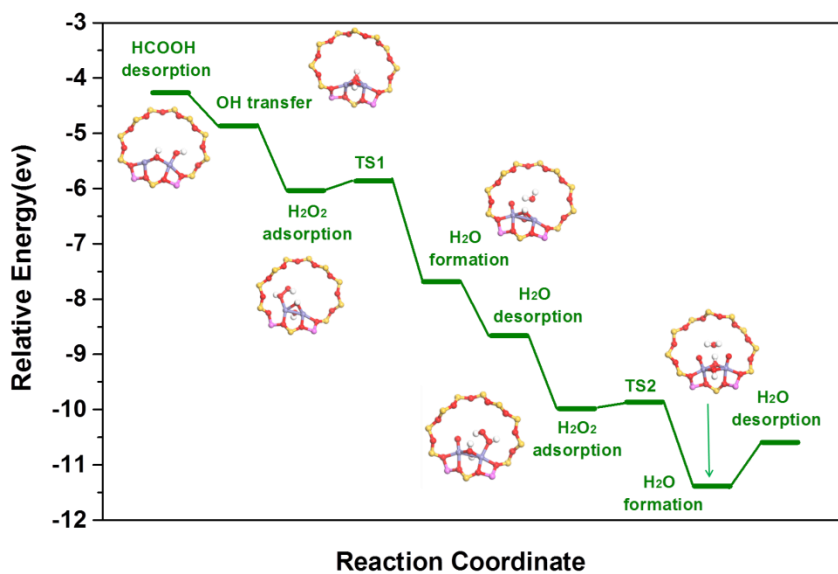

Figure S14. Catalyst regeneration process for HCOOH formation pathway.



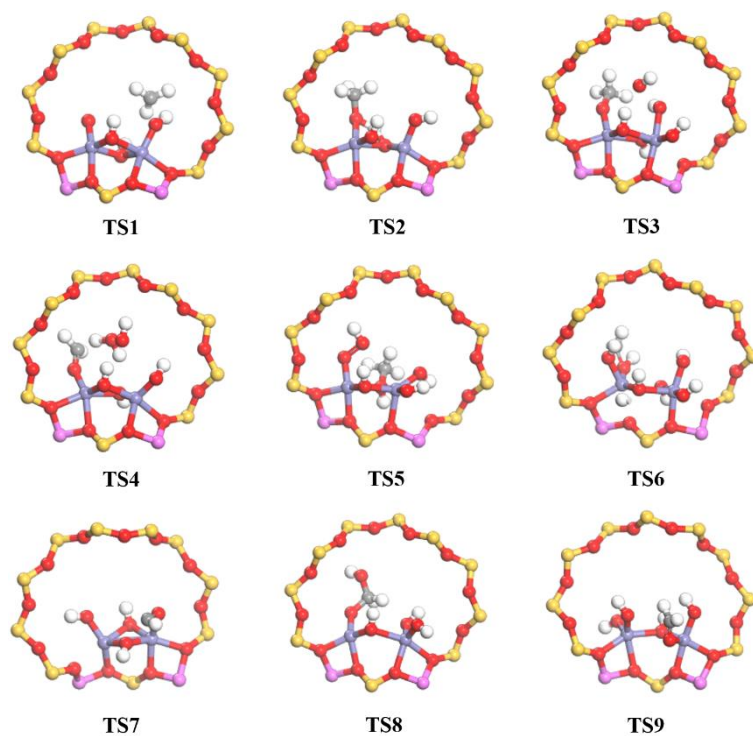

**Figure S15.** Structures of transition states for each elementary reaction step in  $\text{CH}_3\text{OH}$  formation,  $\text{HCOOH}$  formation, and  $\text{HCHO}$  formation.

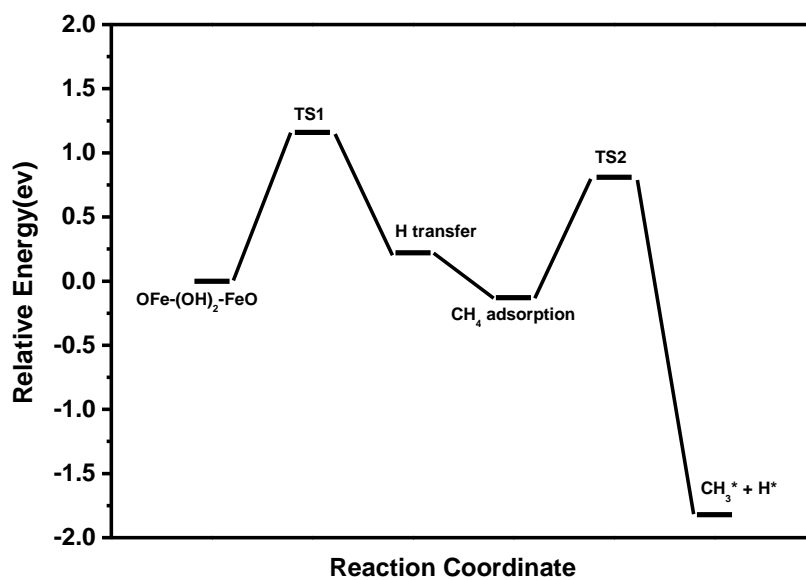

**Figure S16.** Energy profile for H transfer from bridge OH to one bare O and  $\text{CH}_4$  dissociation.

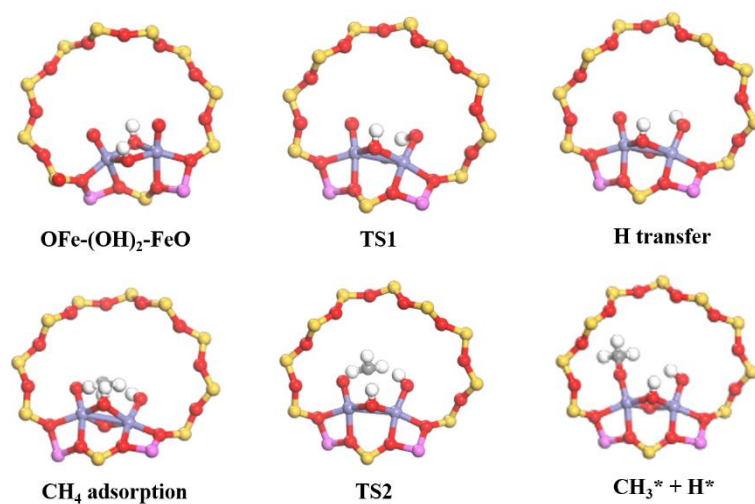

**Figure S17.** Calculated structures in H transfer from bridge OH to one bare O and subsequent CH<sub>4</sub> dissociation.

**Table S1.** R-space fitting and coordination parameters obtained from EXAFS analysis.

| Sample                                   | N (Fe-Fe) <sup>a</sup> | N (Fe-O) <sup>a</sup> | R(Fe-Fe) <sup>b</sup> / Å | R(Fe-O) <sup>b</sup> / Å |
|------------------------------------------|------------------------|-----------------------|---------------------------|--------------------------|
| $\gamma$ -Fe <sub>2</sub> O <sub>3</sub> | 13.5                   | 5.25                  | 3.345                     | 1.920                    |
| 0.5% Fe-MOR-air                          | 1.155±0.368            | 5.758±1.748           | 3.328±0.021               | 1.910±0.025              |

<sup>a</sup> Coordination number; <sup>b</sup> Coordination distance.
